# Supplementary material
Source: PubMed Central journal article supplement (PMC2860474)

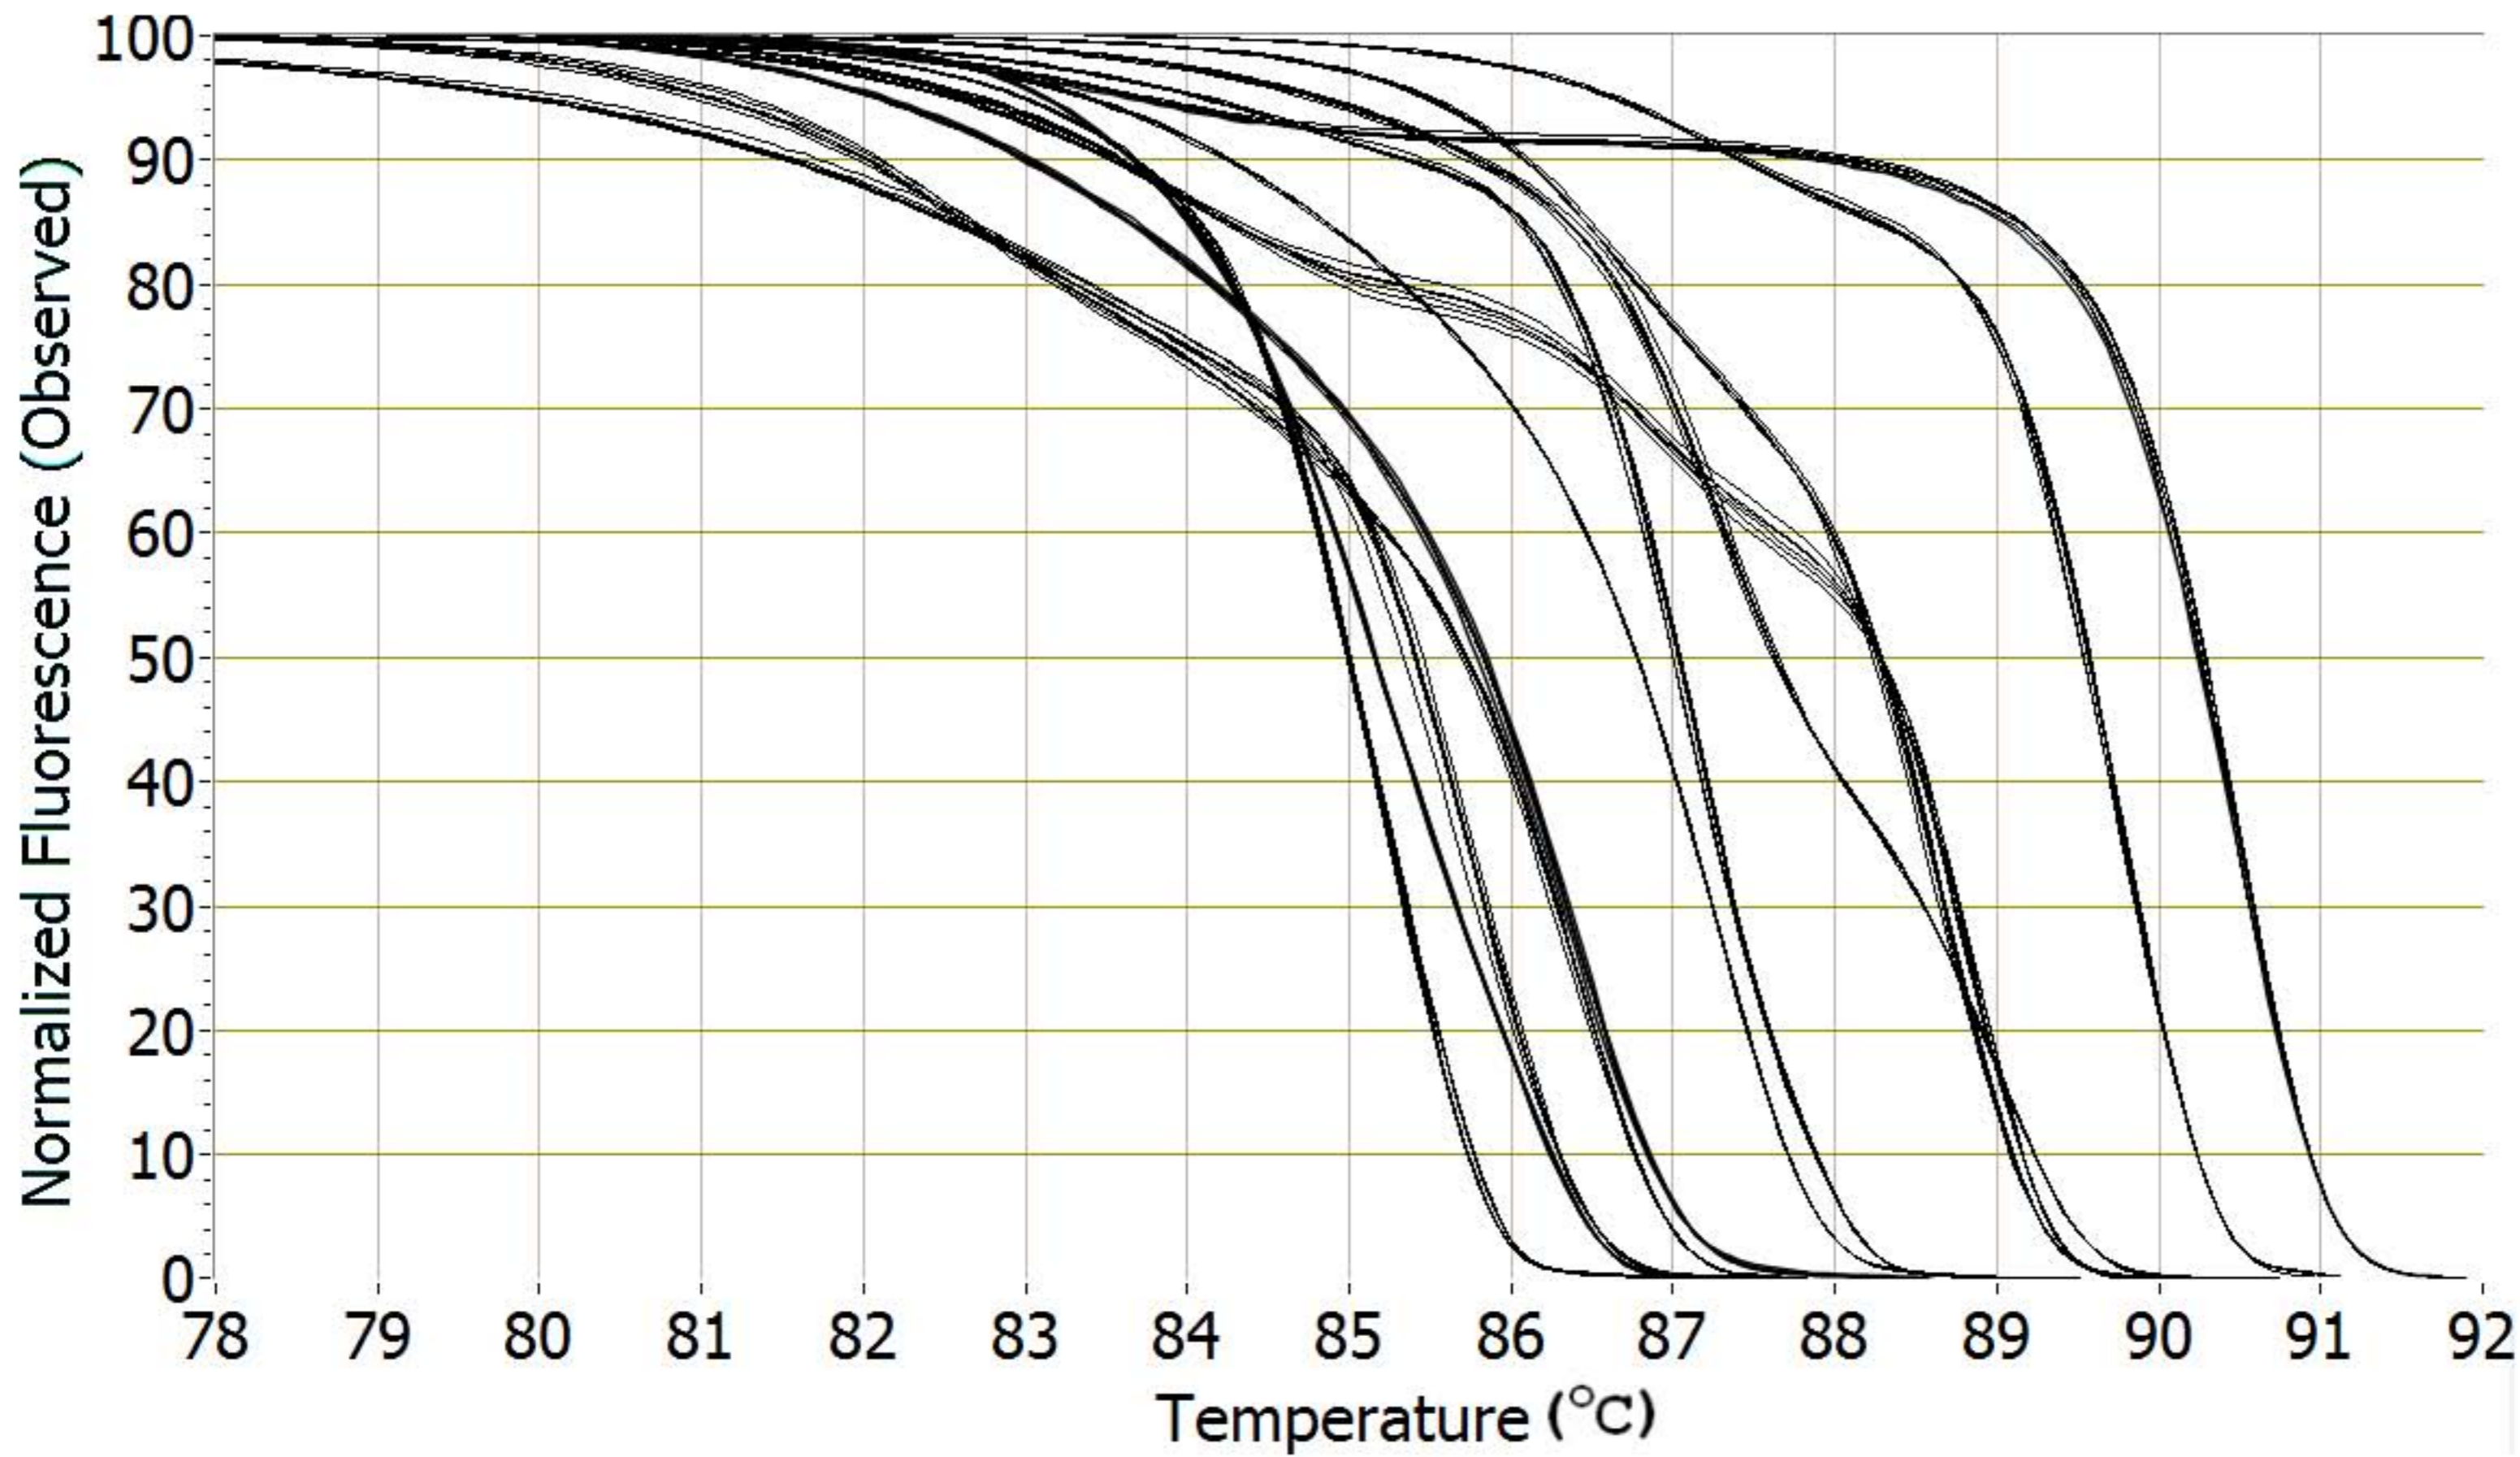

Supplement: mmc1.pdf [file mmc1.pdf]

Normal

Classic X-linked

Variant

Patient

Carrier

Patient

Carrier

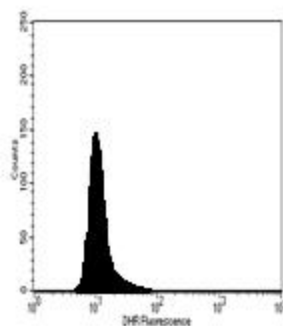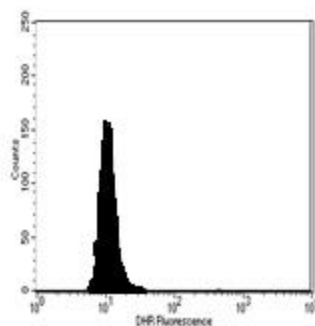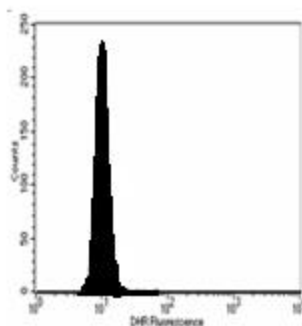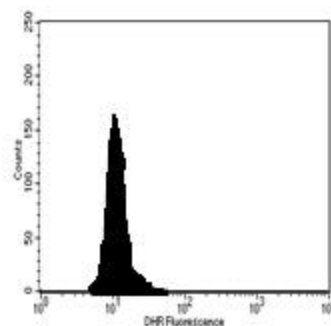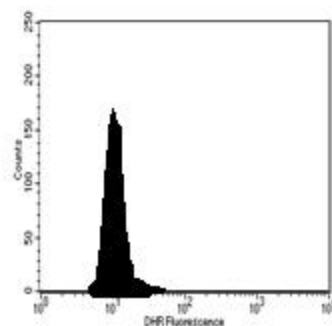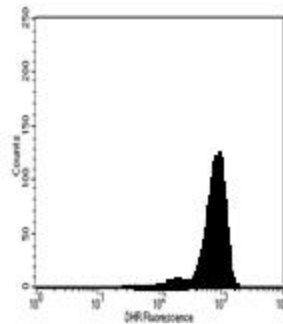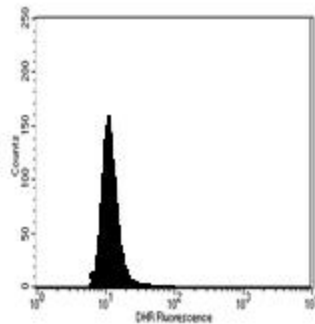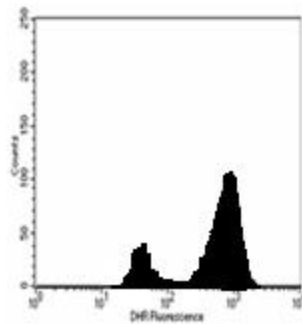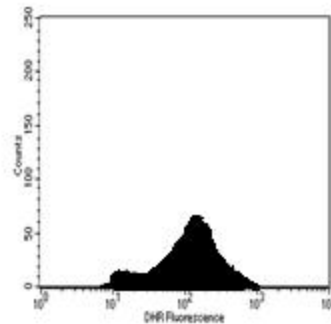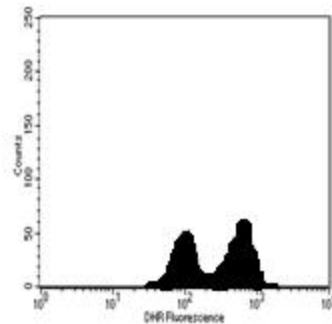

Supplement: mmc2.pdf [file mmc2.pdf]
